# Supplementary material
Source: PubMed Central journal article supplement (PMC6329976)
Supplement: pnas.1814484116.sapp.pdf [file pnas.1814484116.sapp.pdf]

## Supplementary Information for

Analysis of Research Intensity on Infectious Diseases by Disease Burden: Which Infectious Diseases Are Neglected by Researchers?

Yuki Furuse

Email: [furusey.kyoto@gmail.com](mailto:furusey.kyoto@gmail.com)

**This PDF file includes:**

Figs. S1 to S2  
Tables S1 to S2

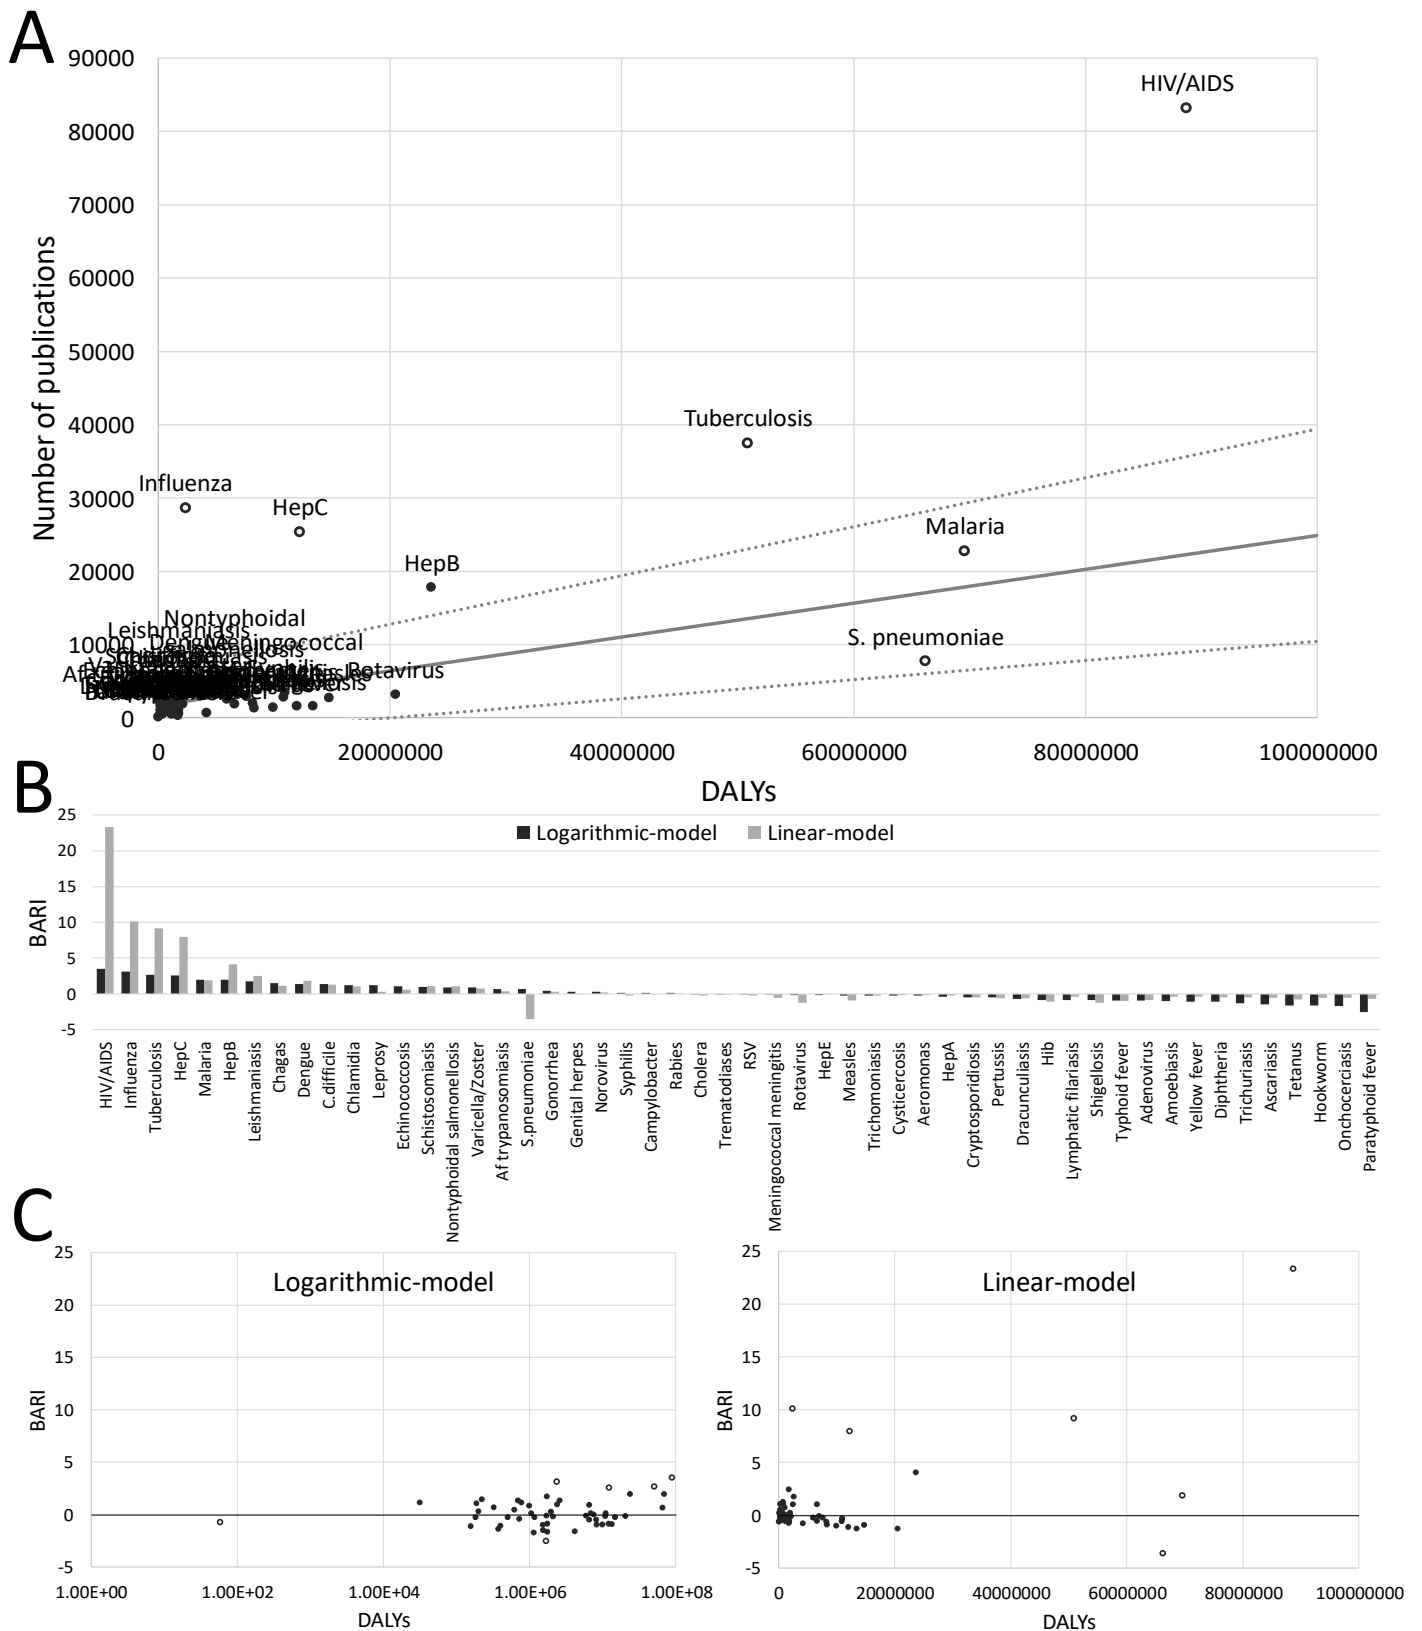

**Fig. S1.** Association between disease burden and research intensity under the assumption of a linear relationship between the two indicators. (A) Linear plot of disease burden (in DALYs) against research intensity (number of publications) for 52 infectious diseases at a global level in 2010–2017. The regression line and its 95% prediction interval were drawn. Diseases considered as outliers and excluded to draw the regression line are indicated by *open circles*. (B) Indices of burden-adjusted research intensity (BARI) for the 52 infectious diseases in the model assuming correlation in logarithmic scale and one assuming correlation in linear scale. (C) Plot of the BARI index by disease burden (DALYs) for each

infectious disease for the model assuming correlation in logarithmic scale (*left panel*) and one assuming correlation in linear scale (*right panel*).

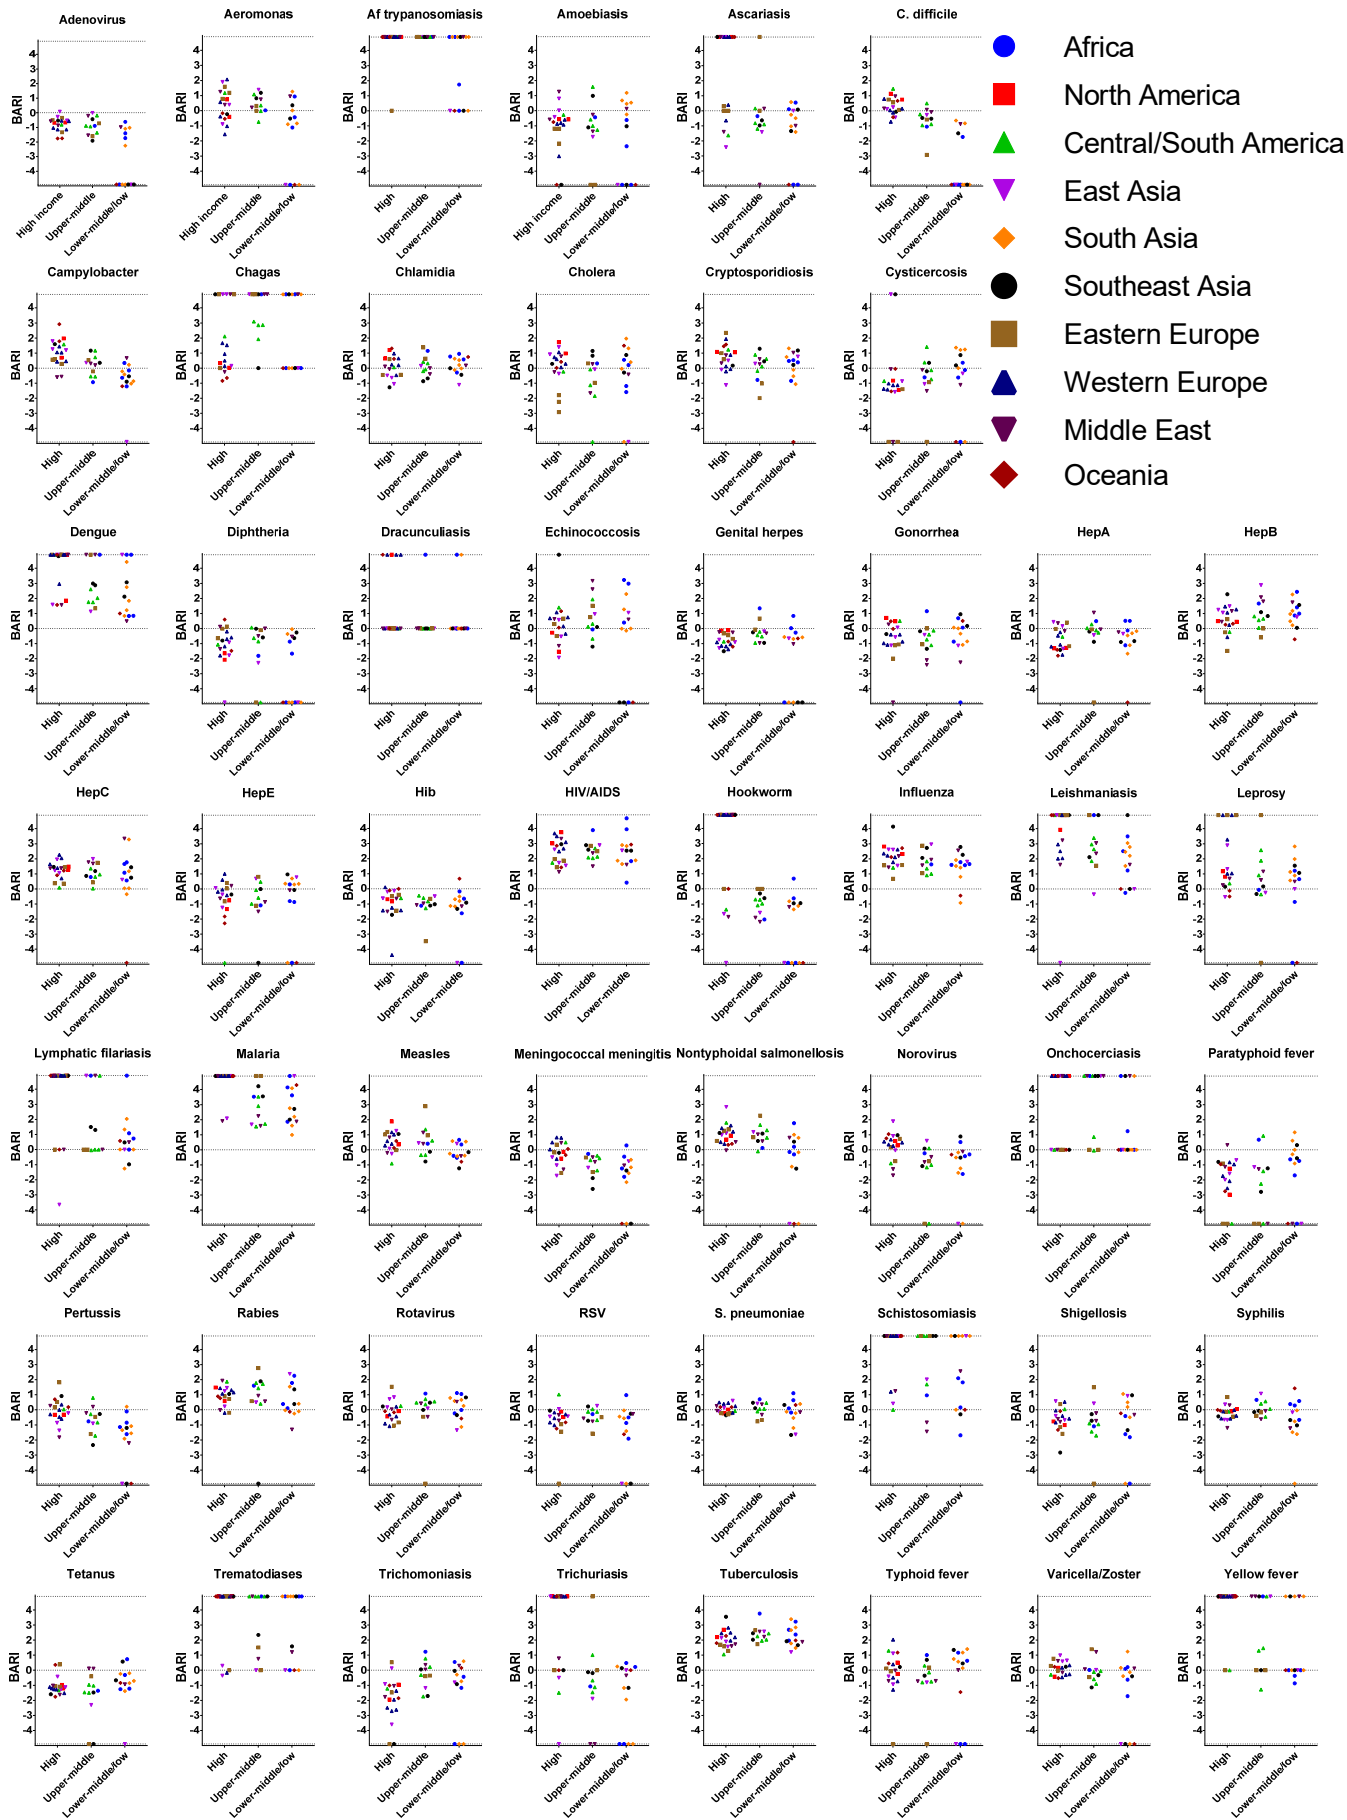

**Fig. S2.** The indices of burden-adjusted research intensity (BARI) at a country level by region and economic level for the 52 infectious diseases. When there is one or more publications about a disease which has no DALYs there, dots were plotted on the top horizontal broken line. When there is no publication about a disease which has no DALYs there, dots were plotted on the middle horizontal broken line. When there is no publication about a disease which has DALYs there, dots were plotted on the bottom horizontal broken line.

**Table S1. Infectious diseases and their classification.**

| Disease                                                          | Label                       | MeSH used for search                                                                                                                                 | Disease burden (DALYs) | Organism  | Transmission    | Vaccine available | Neglected tropical disease |
|------------------------------------------------------------------|-----------------------------|------------------------------------------------------------------------------------------------------------------------------------------------------|------------------------|-----------|-----------------|-------------------|----------------------------|
| Adenovirus infection                                             | Adenovirus                  | "Adenoviruses, Human" OR "Adenovirus Infections, Human"                                                                                              | High                   | Virus     | - <sup>*1</sup> | No                | No                         |
| Aeromonas gastroenteritis                                        | Aeromonas                   | "Aeromonas"                                                                                                                                          | Middle                 | Bacterium | Enteric         | No                | No                         |
| African trypanosomiasis                                          | Af trypanosomiasis          | "Trypanosomiasis, African" OR "Trypanosoma brucei brucei" OR "Trypanosoma brucei gambiense" OR "Trypanosoma brucei rhodesiense"                      | Low                    | Parasite  | Vector          | No                | Yes                        |
| Amoebiasis                                                       | Amoebiasis                  | "Dysentery, Amebic" OR "Entamoeba histolytica"                                                                                                       | Middle                 | Parasite  | Enteric         | No                | No                         |
| Ascariasis                                                       | Ascariasis                  | "Ascariasis" OR "Ascaris lumbricoides"                                                                                                               | Middle                 | Parasite  | Enteric         | No                | Yes                        |
| Pseudomembranous enterocolitis by Clostridium difficile          | C.difficile                 | "Clostridium difficile" OR "Enterocolitis, Pseudomembranous"                                                                                         | Low                    | Bacterium | Enteric         | No                | No                         |
| Campylobacter enteritis                                          | Campylobacter               | "Campylobacter Infections" OR "Campylobacter"                                                                                                        | High                   | Bacterium | Enteric         | No                | No                         |
| Chagas disease                                                   | Chagas                      | "Chagas Disease" OR "Trypanosoma cruzi"                                                                                                              | Low                    | Parasite  | Vector          | No                | Yes                        |
| Chlamydial infection including STD and trachoma                  | Chlamydia                   | "Chlamydia" OR "Chlamydia Infections" OR "Trachoma" OR "Chlamydia trachomatis"                                                                       | Low                    | Bacterium | Sexual          | No                | Yes                        |
| Cholera                                                          | Cholera                     | "Cholera" OR "Vibrio cholerae"                                                                                                                       | High                   | Bacterium | Enteric         | Yes               | No                         |
| Cryptosporidiosis                                                | Cryptosporidiosis           | "Cryptosporidiosis" OR "Cryptosporidium"                                                                                                             | Middle                 | Parasite  | Enteric         | No                | No                         |
| Cysticercosis                                                    | Cysticercosis               | "Cysticercosis" OR "Taenia solium"                                                                                                                   | Low                    | Parasite  | Enteric         | No                | Yes                        |
| Dengue fever                                                     | Dengue                      | "Dengue" OR "Dengue Virus"                                                                                                                           | Middle                 | Virus     | Vector          | No                | Yes                        |
| Diphtheria                                                       | Diphtheria                  | "Diphtheria" OR "Corynebacterium diphtheriae"                                                                                                        | Low                    | Bacterium | Respiratory     | Yes               | No                         |
| Dracunculiasis (Guinea worm disease)                             | Dracunculiasis              | "Dracunculiasis" OR "Dracunculus Nematode"                                                                                                           | Low                    | Parasite  | Enteric         | No                | Yes                        |
| Cystic echinococcosis                                            | Echinococcosis              | "Echinococcosis" OR "Echinococcus"                                                                                                                   | Low                    | Parasite  | Environment     | No                | Yes                        |
| Genital herpes                                                   | Genital herpes              | "Herpes Genitalis" OR "Herpesvirus 2, Human"                                                                                                         | Low                    | Virus     | Sexual          | No                | No                         |
| Gonococcal infection                                             | Gonorrhea                   | "Gonorrhea" OR "Neisseria gonorrhoeae"                                                                                                               | Low                    | Bacterium | Sexual          | No                | No                         |
| Acute hepatitis A                                                | HepA                        | "Hepatitis A" OR "Hepatitis A virus"                                                                                                                 | Low                    | Virus     | Enteric         | Yes               | No                         |
| Hepatitis B (acute and chronic hepatitis/cirrhosis/liver cancer) | HepB                        | "Hepatitis B" OR "Hepatitis B virus"                                                                                                                 | High                   | Virus     | -               | Yes               | No                         |
| Hepatitis C (acute and chronic hepatitis/cirrhosis/liver cancer) | HepC                        | "Hepatitis C" OR "Hepacivirus"                                                                                                                       | High                   | Virus     | -               | No                | No                         |
| Acute hepatitis E                                                | HepE                        | "Hepatitis E" OR "Hepatitis E virus"                                                                                                                 | Middle                 | Virus     | Enteric         | No                | No                         |
| H. influenzae type B meningitis and pneumonia                    | Hib                         | "Haemophilus influenzae type b" OR "Haemophilus Infections"                                                                                          | High                   | Bacterium | Respiratory     | Yes               | No                         |
| HIV/AIDS                                                         | HIV/AIDS                    | "HIV" OR "HIV Infections"                                                                                                                            | High                   | Virus     | Sexual          | No                | No                         |
| Hookworm disease                                                 | Hookworm                    | "Hookworm Infections" OR "Ancylostoma"                                                                                                               | Middle                 | Parasite  | Environment     | No                | Yes                        |
| Influenza                                                        | Influenza                   | "Influenza, Human" OR "Influenzavirus A" OR "Influenzavirus B" OR "Influenzavirus C"                                                                 | Middle                 | Virus     | Respiratory     | Yes               | No                         |
| Leishmaniasis                                                    | Leishmaniasis               | "Leishmaniasis" OR "Leishmania"                                                                                                                      | Middle                 | Parasite  | Vector          | No                | Yes                        |
| Leprosy                                                          | Leprosy                     | "Leprosy" OR "Mycobacterium leprae"                                                                                                                  | Low                    | Bacterium | Respiratory     | No                | Yes                        |
| Lymphatic filariasis                                             | Lymphatic filariasis        | "Elephantiasis, Filarial" OR "Brugia" OR "Wuchereria bancrofti"                                                                                      | Middle                 | Parasite  | Vector          | No                | Yes                        |
| Malaria                                                          | Malaria                     | "Malaria" OR "Plasmodium"                                                                                                                            | High                   | Parasite  | Vector          | No                | No                         |
| Measles                                                          | Measles                     | "Measles" OR "Measles virus"                                                                                                                         | High                   | Virus     | Respiratory     | Yes               | No                         |
| Meningococcal meningitis                                         | Meningococcal meningitis    | "Meningococcal Infections" OR "Neisseria meningitidis"                                                                                               | High                   | Bacterium | Respiratory     | Yes               | No                         |
| Salmonella infections other than typhoid/paratyphoid fevers      | Non-typhoidal salmonellosis | "Salmonella Food Poisoning" OR "Salmonella enteritidis" OR "Salmonella typhimurium"                                                                  | Middle                 | Bacterium | Enteric         | No                | No                         |
| Norovirus infection                                              | Norovirus                   | "Norovirus" OR "Caliciviridae Infections"                                                                                                            | Middle                 | Virus     | Enteric         | No                | No                         |
| Onchocerciasis                                                   | Onchocerciasis              | "Onchocerciasis" OR "Onchocerca"                                                                                                                     | Middle                 | Parasite  | Vector          | No                | Yes                        |
| Paratyphoid fever                                                | Paratyphoid fever           | "Paratyphoid Fever" OR "Salmonella paratyphi A" OR "Salmonella paratyphi B" OR "Salmonella paratyphi C"                                              | Middle                 | Bacterium | Enteric         | No                | No                         |
| Pertussis (whooping cough)                                       | Pertussis                   | "Whooping Cough" OR "Bordetella pertussis"                                                                                                           | High                   | Bacterium | Respiratory     | Yes               | No                         |
| Rabies                                                           | Rabies                      | "Rabies" OR "Rabies virus"                                                                                                                           | Low                    | Virus     | Vector          | Yes               | Yes                        |
| Rotaviral enteritis                                              | Rotavirus                   | "Rotavirus" OR "Rotavirus Infections"                                                                                                                | High                   | Virus     | Enteric         | Yes               | No                         |
| Respiratory syncytial virus infection                            | RSV                         | "Respiratory Syncytial Viruses" OR "Respiratory Syncytial Virus, Human"                                                                              | Middle                 | Virus     | Respiratory     | No                | No                         |
| Pneumococcal meningitis and pneumonia                            | S.pneumoniae                | "Pneumococcal Infections" OR "Streptococcus pneumoniae"                                                                                              | High                   | Bacterium | Respiratory     | Yes               | No                         |
| Schistosomiasis                                                  | Schistosomiasis             | "Schistosomiasis" OR "Schistosoma"                                                                                                                   | Middle                 | Parasite  | Environment     | No                | Yes                        |
| Shigellosis (bacillary dysentery)                                | Shigellosis                 | "Dysentery, Bacillary" OR "Shigella"                                                                                                                 | High                   | Bacterium | Enteric         | No                | No                         |
| Syphilis                                                         | Syphilis                    | "Syphilis" OR "Treponema pallidum"                                                                                                                   | High                   | Bacterium | Sexual          | No                | No                         |
| Tetanus                                                          | Tetanus                     | "Tetanus" OR "Clostridium tetani"                                                                                                                    | Middle                 | Bacterium | Environment     | Yes               | No                         |
| Food-borne trematodiasis                                         | Trematodiasis               | "Clonorchiasis" OR "Opisthorchiasis" OR "Fascioliasis" OR "Paragonimiasis" OR "Clonorchis sinensis" OR "Opisthorchis" OR "Fasciola" OR "Paragonimus" | Middle                 | Parasite  | Enteric         | No                | Yes                        |
| Trichomoniasis                                                   | Trichomoniasis              | "Trichomonas Infections" OR "Trichomonas"                                                                                                            | Low                    | Parasite  | Sexual          | No                | No                         |
| Trichuriasis                                                     | Trichuriasis                | "Trichuriasis" OR "Trichuris"                                                                                                                        | Low                    | Parasite  | Enteric         | No                | Yes                        |
| Tuberculosis                                                     | Tuberculosis                | "Tuberculosis" OR "Mycobacterium tuberculosis"                                                                                                       | High                   | Bacterium | Respiratory     | Yes               | No                         |
| Typhoid fever                                                    | Typhoid fever               | "Typhoid Fever" OR "Salmonella typhi"                                                                                                                | High                   | Bacterium | Enteric         | Yes               | No                         |
| Varicella and herpes zoster                                      | Varicella/Zoster            | "Herpesvirus 3, Human" OR "Varicella Zoster Virus Infection"                                                                                         | Low                    | Virus     | Respiratory     | Yes               | No                         |
| Yellow fever                                                     | Yellow fever                | "Yellow Fever" OR "Yellow fever virus"                                                                                                               | Low                    | Virus     | Vector          | Yes               | No                         |

\*1 Not classified.

**Table S2. Countries or territories included in the country-level analysis and their classification.**

| Country/territory | Region                | Economy      |
|-------------------|-----------------------|--------------|
| Argentina         | Central/South America | Upper-middle |
| Australia         | Oceania               | High         |
| Bangladesh        | South Asia            | Lower-middle |
| Brazil            | Central/South America | Upper-middle |
| Canada            | North America         | High         |
| Chile             | Central/South America | High         |
| China             | East Asia             | Upper-middle |
| Colombia          | Central/South America | Upper-middle |
| Croatia           | Eastern Europe        | Upper-middle |
| Czech Republic    | Eastern Europe        | High         |
| Egypt             | Middle East           | Lower-middle |
| France            | Western Europe        | High         |
| Germany           | Western Europe        | High         |
| Hungary           | Eastern Europe        | High         |
| India             | South Asia            | Lower-middle |
| Indonesia         | Southeast Asia        | Lower-middle |
| Iran              | Middle East           | Upper-middle |
| Israel            | Middle East           | High         |
| Italy             | Western Europe        | High         |
| Japan             | East Asia             | High         |
| Kenya             | Africa                | Lower-middle |
| Malaysia          | Southeast Asia        | Upper-middle |
| Mexico            | Central/South America | Upper-middle |
| Mongolia          | East Asia             | Lower-middle |
| Morocco           | Africa                | Lower-middle |
| Nepal             | South Asia            | Low          |
| New Zealand       | Oceania               | High         |
| Nigeria           | Africa                | Lower-middle |
| Pakistan          | South Asia            | Lower-middle |
| Papua New Guinea  | Oceania               | Lower-middle |
| Poland            | Eastern Europe        | High         |
| Russia            | Eastern Europe        | Upper-middle |
| Saudi Arabia      | Middle East           | High         |
| Singapore         | Southeast Asia        | High         |
| South Africa      | Africa                | Upper-middle |
| South Korea       | East Asia             | High         |
| Spain             | Western Europe        | High         |
| Sri Lanka         | South Asia            | Lower-middle |
| Taiwan            | East Asia             | High         |
| Thailand          | Southeast Asia        | Upper-middle |
| Tunisia           | Africa                | Lower-middle |
| Turkey            | Middle East           | Upper-middle |
| United Kingdom    | West Europe           | High         |
| USA               | North America         | High         |
| Vietnam           | Southeast Asia        | Lower-middle |
